# Supplementary material for: Response to Cold: A Comparative Transcriptomic Analysis in Eight Cold-Adapted Yeasts
Source: Front Microbiol. 2022 Feb 23;13:828536. doi: 10.3389/fmicb.2022.828536 (PMC8905146; doi:10.3389/fmicb.2022.828536)
Supplement: Supplementary Table 1 — Summary of transcriptome sequencing results. [file Table_1.XLSX]

## Sheet: S1
	Table S1. Summary of transcriptome sequencing
	FastQC results						Parameters and commands used in bioinformatic processing
	Yeast	Sample Name	% Dups	% GC	M Seqs		# error correction 1
	Crysp	Cryptococcus_H_R1	95	0.52	31.9		bbmerge.sh in=${sampleName}_recal.fastq \
		Cryptococcus_H_R2	93.3	0.52	31.9		out=${sampleName}_ec1.fastq \
		Cryptococcus_L_R1	95	0.51	32.1		interleaved \
		Cryptococcus_L_R2	93.3	0.52	32.1		ecco \
	Csake	Csake_H_R1	88.7	0.42	32.3		mix
		Csake_H_R2	87.5	0.43	32.3
		Csake_L_R1	84.5	0.42	31.9		# error correction 2
		Csake_L_R2	82.7	0.42	31.9		clumpify.sh in=${sampleName}_ec1.fastq \
	Lcrea	Lcreatinivora_H_R1	76	0.59	31.7		out=${sampleName}_ec2.fastq \
		Lcreatinivora_H_R2	79.1	0.59	31.7		interleaved \
		Lcreatinivora_L_R1	78.5	0.59	31.9		ecc \
		Lcreatinivora_L_R2	80.3	0.59	31.9		passes=6
	Mgeli	Mgelida_H_R1	79.9	0.56	32
		Mgelida_H_R2	81.3	0.56	32		# error correction 3
		Mgelida_L_R1	79	0.56	32.1		tadpole.sh in=${sampleName}_ec2.fastq \
		Mgelida_L_R2	79.1	0.56	32.1		out1=${sampleName}_val_1.fastq.gz \
	Pgla	Pglacialis_H_R1	95.9	0.51	31.9		out2=${sampleName}_val_2.fastq.gz \
		Pglacialis_H_R2	94.7	0.52	31.9		interleaved \
		Pglacialis_L_R1	93.1	0.51	32.1		mode=correct
		Pglacialis_L_R2	92	0.52	32.1
	Tetsp	X_A_Tet22_R1	79.9	0.49	31.5		# normalization
		X_A_Tet22_R2	79.3	0.49	31.5		bbnorm.sh in=${sampleName}_val_1.fastq.gz \
		X_B_Tet4_Tet4_R1	77.9	0.49	31.4		in2=${sampleName}_val_2.fastq.gz \
		X_B_Tet4_Tet4_R2	77.1	0.49	31.4		out=${sampleName}_norm_1.fastq.gz \
	Vvic	Vvictoriae_H_R1	83.7	0.51	31.9		out2=${sampleName}_norm_2.fastq.gz \
		Vvictoriae_H_R2	83.8	0.51	31.9		target=100 \
		Vvictoriae_L_R1	82	0.51	32.2		fixspikes \
		Vvictoriae_L_R2	82.1	0.51	32.2		prefilter \
	Wanom	Wanomalus_H_R1	89.8	0.37	32.3		mindepth=3 \
		Wanomalus_H_R2	87.8	0.37	32.3		minkmers=1 \
		Wanomalus_L_R1	86.4	0.36	32.1		tossbadreads=t \
		Wanomalus_L_R2	84.8	0.36	32.1		deterministic=f
							# preassembly
	Contigs asembled and ORF prediction						spades.py --rna \
			Contigs**				--only-assembler \
	Yeast	(ºC)*	Number	Max	Predited ORF**		--pe1-1 ${sampleName}_norm_1.fastq.gz \
	Crysp	10	32090	7296	39335		--pe1-2 ${sampleName}_norm_2.fastq.gz
		4	29542	7315	37748
	Csake	22	24963	10791	27722		# merge preassembly files
		4	17877	11257	26667		dedupe.sh in=${preassemblyFilesString} \
	Lcrea	22	32379	6799	99705		out=assembly.fasta \
		4	31122	6902	93816		minscaf=240 \
	Mgeli	10	31218	8562	83064		sort=length \
		4	31057	8124	84269		minidentity=99 \
	Pgla	15	30105	7841	38410		k=21
		4	26594	7787	47903
	Tetsp	22	34096	9551	91126
		4	33184	10586	90724
	Vvic	15	24121	9569	52347
		4	27124	9563	54493
	Wanom	30	26721	5643	19896
		4	28076	5613	23078
	*, incubation temperature. **, minimal length 210 nt
