# Supplementary material for: Response to Cold: A Comparative Transcriptomic Analysis in Eight Cold-Adapted Yeasts
Source: Front Microbiol. 2022 Feb 23;13:828536. doi: 10.3389/fmicb.2022.828536 (PMC8905146; doi:10.3389/fmicb.2022.828536)
Supplement: Supplementary Table 5 — Structural comparisons between Antarctic and template orthologous. [file Table_5.XLSX]

## Sheet: S5
	Table S5. Structural comparisons between Antarctic and template orthologous
	Parameter (%)	Temp-Ant*	ANOVA P value	Tukey p alue
	Charged AAs in beta sheet	3.6	0.02	0.02
	AAs in alpha helice	1	0.000127	0.0001271
	AAs in beta sheet	0.4	0.02	0.02
	AAs in coil	-0.6	0.004	0.004
	H-bonds	14	8.6e-07	9.4e-07
	Ionic interaction	0.2	0.001	0.001
	The calculated structural properties were determined in 3D structure predicted for Antarctic enzymes and the corresponding templates used for modelling. The comparisons were performed between Antarctic and template enzymes and those with significant differences (ANOVA-Tukey, p < 0.05) are shown. *, Mean difference of template minus Antarctic.
